# Supplementary material for: Higher admission rates and in-hospital mortality for acute type A aortic dissection during Influenza season: a single center experience
Source: PubMed Central journal article supplement (PMC7070060; doi:10.1038/s41598-020-61717-5), 2020-03-13

## Higher admission rates and in-hospital mortality for acute type A aortic dissection during Influenza season: a single center experience

Carmel Ashur MD, Elizabeth Norton, Linda Farhat, Anna Conlon PhD, Cristen Willer PhD, James B. Froehlich MD, David J. Pinsky MD, Karen M. Kim MD, Shinichi Fukuhara MD, Michael G. Deeb, MD, Himanshu Patel MD, Kim A. Eagle MD, Yang Bo MD, Marion A. Hofmann Bowman MD

Supplement figure 1: Comparison of acute type A aortic dissection admission rates between months with high and low flu activity, as determined by Influenza Like Illness Network (a), Influenza Hospital Surveillance Project (b) and University of Michigan lab confirmed cases (c).

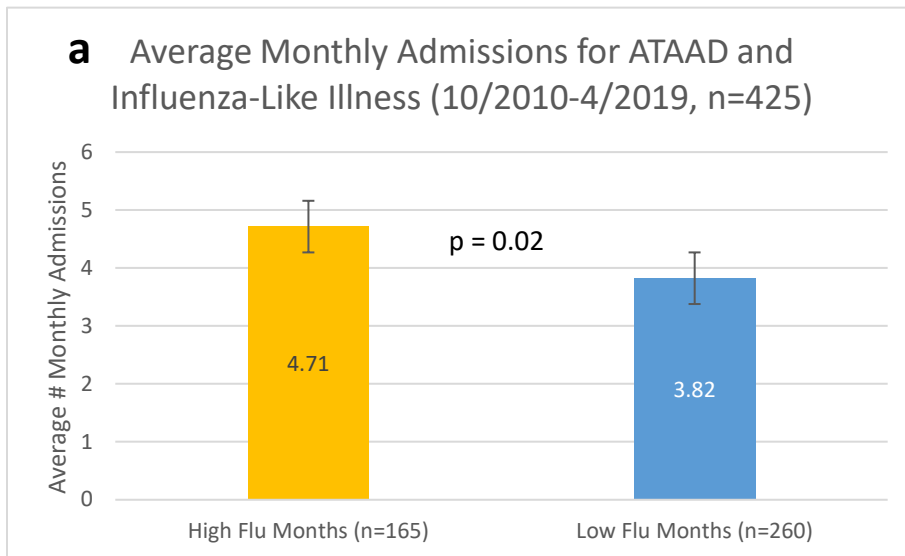

**b** Average Monthly Admissions for ATAAD and State Confirmed Influenza Hospitalizations (10/2009-4/2019, n=455)

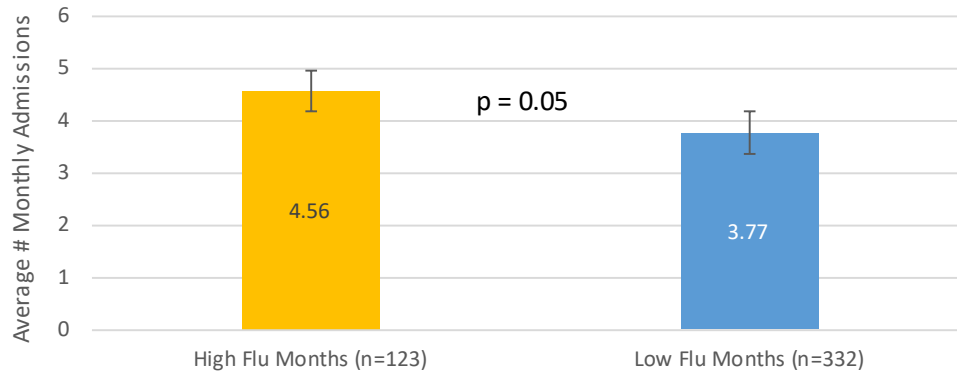

**c** Average Monthly Admissions for ATAAD and In Hospital Confirmed Cases of Influenza (10/2013-4/2019, n=307)

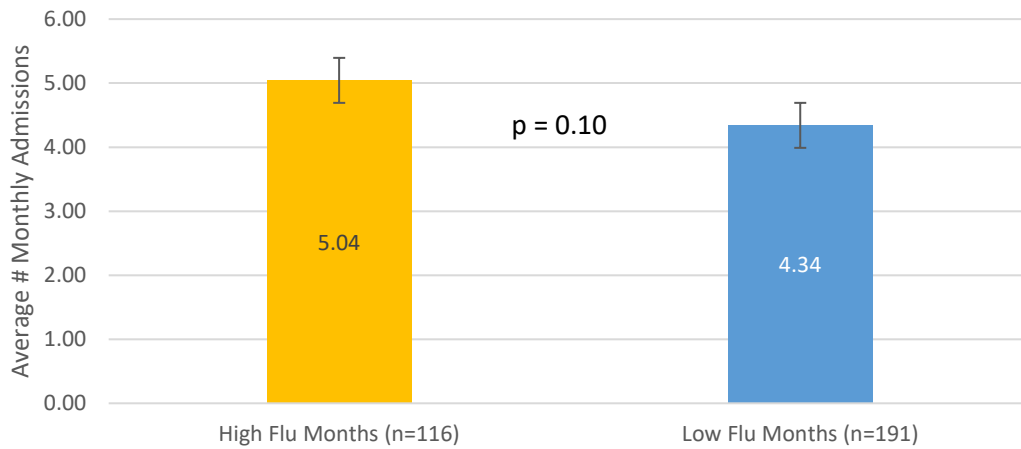

Supplement: 41598_2020_61717_MOESM1_ESM.pdf [file 41598_2020_61717_MOESM1_ESM.pdf]
